# Supplementary material for: Shigella Effector OspB Activates mTORC1 in a Manner That Depends on IQGAP1 and Promotes Cell Proliferation
Source: PubMed Central journal article supplement (PMC4608727; doi:10.1371/journal.ppat.1005200), 2015-10-16
Supplement: ppat.1005200.s002.pdf [file ppat.1005200.s002.pdf]

**Table S1. Cell characteristics and *S. flexneri* entry and actin based motility phenotypes are similar in the absence versus presence of IQGAP1 in MEFs**

|                                               |                                      | Measure                                                               | Data (mean $\pm$ S.D.)           |                       |
|-----------------------------------------------|--------------------------------------|-----------------------------------------------------------------------|----------------------------------|-----------------------|
|                                               |                                      |                                                                       | IQGAP1 <sup>-/-</sup>            | IQGAP1 <sup>+/+</sup> |
| <i>S. flexneri</i><br>virulence<br>phenotypes | Entry                                | Internalized bacteria<br>(no./well)                                   | 1520 $\pm$ 520                   | 1460 $\pm$ 590        |
|                                               |                                      | Plaque formation (no./well)                                           | 58 $\pm$ 23                      | 49 $\pm$ 26           |
|                                               | Actin based<br>motility <sup>a</sup> | Actin tail length ( $\mu$ m)                                          | 29 $\pm$ 7                       | 28 $\pm$ 4            |
|                                               |                                      | Actin tail frequency (% of<br>bacteria)                               | 44 $\pm$ 17                      | 51 $\pm$ 16           |
|                                               |                                      | Speed in the cytoplasm<br>( $\mu$ m/sec)                              | 50 $\pm$ 21                      | 56 $\pm$ 28           |
|                                               |                                      | Speed in protrusions<br>( $\mu$ m/sec)                                | 42 $\pm$ 21                      | 43 $\pm$ 17           |
|                                               | Cellular<br>phenotypes               | Cell size                                                             | Area (pixels x 10 <sup>3</sup> ) | 8.1 $\pm$ 3.0         |
| Cortical<br>actin<br>density                  |                                      | Signal intensity at<br>cortex/signal intensity in<br>cell body (a.u.) | 0.92 $\pm$ 0.04                  | 0.89 $\pm$ 0.03       |

<sup>a</sup> Measurements were taken at 2 hrs. of infection.
